# Supplementary material for: Deposition of hydrogenated silicon clusters for efficient epitaxial growth
Source: Royal Society of Chemistry journal article supplement (doi:10.1039/c8cp00764k), 2018-01-01
Supplement: c8cp00764k1.zip [file c8cp00764k1.zip]

*Supporting Information for*

# **Deposition of hydrogenated silicon clusters for efficient epitaxial growth**

Ha-Linh Thi Le, Fatme Jardali, and Holger Vach

*CNRS, LPICM, Ecole Polytechnique, University Paris-Saclay, 91128 Palaiseau, France*

\*Corresponding author. Holger Vach. Email: [holger.vach@polytechnique.edu](mailto:holger.vach@polytechnique.edu)  
Phone: +33 1 69 33 43 73. Fax: +33 1 69 33 43 33

**M1.** Movie demonstrating a typical deposition of the amorphous  $\text{Si}_{15}\text{H}_{10}$  cluster on a H-terminated Si(100)-(2×1) substrate with an impact energy of 5.30 eV/atom and a substrate temperature of 373 K under normal incidence.

**M2.** Movie demonstrating a typical deposition of the crystalline  $\text{Si}_{29}\text{H}_{24}$  cluster on a H-terminated Si(100)-(2×1) substrate with an impact energy of 3.67 eV/atom, a substrate temperature of 473 K, and an incidence angle of 30°.

## Parameter modification of the Ohira-Tersoff potential

The Ohira-Tersoff potential,  $V$ , is given as a function of the atomic coordinates by

$$V = \frac{1}{2} \sum_i \sum_{j \neq i} [a_{ij} V_r(r_{ij}) + b_{ij} V_a(r_{ij})] f_c(r_{ij}), \quad (1)$$

where

$$V_r(r_{ij}) = A_{ij} \exp(-\lambda_{ij} r_{ij}), \quad V_a(r_{ij}) = -B_{ij} \exp(-\mu_{ij} r_{ij}), \quad (2)$$

$$a_{ij} = \epsilon_{ij} (1 + \beta_i^{n_i} \tau_{ij}^{n_i})^{-1/2n_i}, \quad b_{ij} = \chi_{ij} (1 + \beta_i^{n_i} \xi_{ij}^{n_i})^{-m_i/2n_i}, \quad (3)$$

$$\tau_{ij} = \sum_{k \neq i, j} f_c(r_{ik}) \delta_{ik} g(\theta_{ijk}), \quad (4)$$

$$\xi_{ij} = \sum_{k \neq i, j} f_c(r_{ik}) \omega_{ik} g(\theta_{ijk}) \exp[\sigma_{ik}(r_{ij} - r_{ik})], \quad (5)$$

$$g(\theta_{ijk}) = 1 + \frac{c_i^2}{d_i^2} - \frac{c_i^2}{[d_i^2 + (h_i - \cos \theta_{ijk})^2]}, \quad (6)$$

$$f_c(r_{ij}) = \begin{cases} 1, & r_{ij} \leq R_{ij} \\ \frac{1}{2} + \frac{1}{2} \cos\left(\frac{\pi(r_{ij} - R_{ij})}{S_{ij} - R_{ij}}\right), & R_{ij} < r_{ij} < S_{ij} \\ 0, & r_{ij} \geq S_{ij} \end{cases} \quad (7)$$

In Eqs. 1-7,  $i$ ,  $j$  and  $k$  denote the atoms in the system,  $r_{ij}$  is the distance between atoms  $i$  and  $j$ , and  $\theta_{ijk}$  is the angle between the vectors  $\mathbf{r}_{ij}$  and  $\mathbf{r}_{ik}$ . The functions  $V_r(r_{ij})$  and  $V_a(r_{ij})$  in Eq. 2 represent a repulsive and an attractive pair potential, respectively. The smooth cutoff function  $f_c(r_{ij})$  presented in Eq. 7 is employed to limit the range of the potential, and therefore, to reduce the computational cost. The functions  $a_{ij}$  and  $b_{ij}$  in Eq. 3 represent a measure of the bond order and strength, which depend on the local environment. The parameters (shown in Table 1) for Si-Si interactions were defined by Tersoff [1, 2], whereas the corresponding parameters for H-H, Si-H, and the corresponding three-body interactions were derived from *ab initio* calculations (configuration interaction methods), from a different empirical interatomic potential for Si-H interactions and from experimental measurements by Ohira and co-workers [3, 4, 5]. Table 2 shows the re-optimized S parameter for H-H interaction used in this work.

Table 1: Parameters of the Ohira-Tersoff potential.

| $i - j$                     | Si-Si                | H-H    | Si-H, H-Si           |
|-----------------------------|----------------------|--------|----------------------|
| $A(eV)$                     | $1.8308 \times 10^3$ | 80.07  | $4.8733 \times 10^2$ |
| $B(eV)$                     | $4.7118 \times 10^2$ | 31.38  | $1.8470 \times 10^2$ |
| $\lambda (\text{\AA}^{-1})$ | 2.4799               | 4.2075 | 2.9117               |
| $\mu (\text{\AA}^{-1})$     | 1.7322               | 1.7956 | 1.9898               |
| $R (\text{\AA})$            | 2.70                 | 1.10   | 1.85                 |
| $S (\text{\AA})$            | 3.00                 | 1.7    | 2.05                 |
| $\chi$                      | 1.0                  | 1.0    | 1.0485               |
| $\epsilon$                  | 1.0                  | 1.0    | 1.1027               |

| $i - j - k$           | Si-Si-Si             | H-H-Si | Si-H-Si              | H-Si-Si              |
|-----------------------|----------------------|--------|----------------------|----------------------|
| $\sigma (\text{\AA})$ | 0.0                  | 3.0    | 0.0                  | 0.0                  |
| c                     | $1.0039 \times 10^5$ | 0.0    | $1.0039 \times 10^5$ | $4.7762 \times 10^5$ |
| d                     | 16.217               | 1.0    | 16.217               | $6.3214 \times 10^2$ |
| $\omega$              | 1.0                  | 4.0    | 0.0                  | 0.6999               |
| $\delta$              | 0.0                  | 0.0    | 0.0                  | 0.0                  |
| $\beta$               | $1.1 \times 10^{-6}$ | 1.0    | $1.1 \times 10^{-6}$ | 1.0                  |
| n                     | 0.78734              | 1.0    | 0.78734              | 1.0                  |
| h                     | -0.59825             | -1.0   | -0.59825             | -1.0                 |
| m                     | 1.0                  | 1.6094 | 1.0                  | 1.6094               |
| $i - j - k$           | Si-Si-H              | H-H-H  | Si-H-H               | H-Si-H               |
| $\sigma (\text{\AA})$ | 0.0                  | 3.0    | 0.0                  | 3.0                  |
| c                     | $1.0039 \times 10^5$ | 0.0    | $1.0039 \times 10^5$ | 0.0                  |
| d                     | 16.217               | 1.0    | 16.217               | 1.0                  |
| $\omega$              | 1.5                  | 4.0    | 0.4                  | 4.0                  |
| $\delta$              | 0.0                  | 0.0    | 0.8512               | 0.0                  |
| $\beta$               | $1.1 \times 10^{-6}$ | 1.0    | $1.1 \times 10^{-6}$ | 1.0                  |
| n                     | 0.78734              | 1.0    | 0.78734              | 1.0                  |
| h                     | -0.59825             | -1.0   | -0.59825             | -1.0                 |
| m                     | 1.0                  | 1.6094 | 1.0                  | 1.6094               |

Table 2: Reoptimized parameter of the Ohira-Tersoff potential.

|                    |      |
|--------------------|------|
| $i - j$            | H-H  |
| S ( $\text{\AA}$ ) | 3.37 |

## References

- [1] J. Tersoff. Modeling solid-state chemistry: Interatomic potentials for multicomponent systems. *Phys. Rev. B*, 39:5566, 1989.
- [2] J. Tersoff. New empirical model for the structural properties of silicon. *Phys. Rev. Lett.*, 56:632, 1986.
- [3] T. Ohira, T. Inamuro, and T. Adachi. Molecular dynamics simulation of hydrogenated amorphous silicon with tersoff potential. *Mat. Res. Soc. Symp. Proc.*, 336:177, 1994.
- [4] T. Ohira, O. Ukai, M. Noda, Y. Takeyuchi, M. Murata, and H. Yoshida. Molecular dynamics simulations of hydrogenated amorphous silicon thin-film growth. *Mat. Res. Soc. Symp. Proc.*, 408:445, 1996.
- [5] T. Ohira, O. Ukai, and M. Noda. Fundamental processes of microcrystalline silicon lm growth: a molecular dynamics study. *Surf. Sci.*, 458:216, 2000.
